# Supplementary material
Source: HighWire-hosted journal article supplement (https://erj.ersjournals.com/content/56/5/2000622)
Supplement: inline-supplementary-material-1 [file inline-supplementary-material-1.pdf]

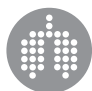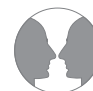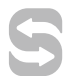

SHAREABLE PDF

# Stability of eosinophilic inflammation in COPD bronchial biopsies

Andrew Higham <sup>1</sup>, Sophie Leow-Dyke<sup>2</sup>, Natalie Jackson<sup>2</sup> and Dave Singh<sup>1,2</sup>

**Affiliations:** <sup>1</sup>Division of Infection, Immunity and Respiratory Medicine, School of Biological Sciences, Faculty of Biology, Medicine and Health, Manchester Academic Health Science Centre, The University of Manchester and Manchester University NHS Foundation Trust, Manchester, UK. <sup>2</sup>Medicines Evaluation Unit, Manchester, UK.

**Correspondence:** Andrew Higham, The University of Manchester and Manchester University NHS Foundation Trust 2nd Floor, ERC, Southmoor Road, Manchester M23 9LT, UK. E-mail: [andrew.higham@manchester.ac.uk](mailto:andrew.higham@manchester.ac.uk)

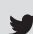

@ERSpublications

**Eosinophilic airway inflammation shows greater regional and temporal variability in COPD patients with higher numbers of submucosal eosinophils** <https://bit.ly/3cApnTd>

**Cite this article as:** Higham A, Leow-Dyke S, Jackson N, *et al.* Stability of eosinophilic inflammation in COPD bronchial biopsies. *Eur Respir J* 2020; 56: 2000622 [<https://doi.org/10.1183/13993003.00622-2020>].

This single-page version can be shared freely online.

## *To the Editor:*

Blood eosinophil counts (BEC) predict the response to inhaled corticosteroids (ICS) in COPD patients with increased exacerbation risk [1, 2]. Studies have shown an association between BEC and both sputum and lung tissue eosinophil counts in COPD patients [3, 4], supporting BEC as a biomarker that reflects the degree of eosinophilic lung inflammation. While the long-term stability of BEC in COPD patients has been studied [5–7], the stability of eosinophilic airway inflammation in COPD patients is less clear. Good stability of COPD sputum eosinophil counts up to 3 months has been reported [8, 9], but similar analysis using submucosal eosinophil counts (SMEC) are lacking.
